# Supplementary material
Source: Research Square preprint supplement (doi:10.21203/rs.3.rs-9514342/v1)
Supplement: Supplementary file 1 [file eef30ce987422ef497bcacf5.pdf]

# Supporting Information

## Structure-Activity Analysis of Metabolic Homeostasis in Algal-Bacterial Systems and Their Performance in Removing Refractory Pollutants

Shuangnan Li<sup>1,2</sup>, Haoyu Zhang<sup>1</sup>, Jiayi Chen<sup>1</sup>, Xinran Qi<sup>1</sup>, Peilong Du<sup>1</sup>, Aoqi Shen<sup>1</sup>, Peng Cao<sup>1,2\*</sup>

### Affiliation

<sup>1</sup> School of Chemical Engineering, Shandong Institute of Petroleum and Chemical Technology, Dongying, Shandong, 257000, China

<sup>2</sup> Shandong key Laboratory of Green Electricity&Hydrogen Science and Technology, Dongying, Shandong, 257000, China

Authors Email address: [2019021@sdipct.edu.cn](mailto:2019021@sdipct.edu.cn), [2019020@sdipct.edu.cn](mailto:2019020@sdipct.edu.cn), [320788416@qq.com](mailto:320788416@qq.com), [1241560308@qq.com](mailto:1241560308@qq.com), [2878419417@qq.com](mailto:2878419417@qq.com), [2544991336@qq.com](mailto:2544991336@qq.com)

\*Corresponding author: E-mail address: [caopeng@sdipct.edu.cn](mailto:caopeng@sdipct.edu.cn)

---

## 1. BG-11 Medium Formulation

Table S1. Macro- and Micronutrient Components of BG-11 Medium

| Number | Chemical                                           | Stock Solution(g/L) | Volume(mL/L) |
|--------|----------------------------------------------------|---------------------|--------------|
| 1      | Na <sub>2</sub> CO <sub>3</sub>                    | 2                   | 10           |
| 2      | Anhydrous citric acid                              | 0.66                | 10           |
| 3      | K <sub>2</sub> HPO <sub>4</sub> ·3H <sub>2</sub> O | 5.2                 | 22.5         |
| 4      | MgSO <sub>4</sub> ·7H <sub>2</sub> O               | 7.5                 | 16           |
| 5      | CaCl <sub>2</sub>                                  | 2.7                 | 10           |
| 6      | EDTA                                               | 0.11                | 11           |
| 7      | Ammonium ferric citrate                            | 0.6                 | 10           |
| 8      | NaHCO <sub>3</sub>                                 | 23.4                | 100          |
| 9      | NaNO <sub>3</sub>                                  | 15                  | 55.3         |
| 10     | A5                                                 | -                   | 0.2          |

Table S2. Composition of A5 Trace Elements Solution

| Number | Chemical                 | Concentration (g/L) |
|--------|--------------------------|---------------------|
| 1      | $H_3BO_3$                | 2.86                |
| 2      | $MnCl_2 \cdot 4H_2O$     | 1.86                |
| 3      | $ZnSO_4 \cdot 7H_2O$     | 0.22                |
| 4      | $Na_2MoO_4 \cdot 2H_2O$  | 0.39                |
| 5      | $Co(NO_3)_2 \cdot 6H_2O$ | 0.05                |
| 6      | $CuSO_4 \cdot 5H_2O$     | 0.08                |

## 2. Printing and Dyeing Factory Process Drawing

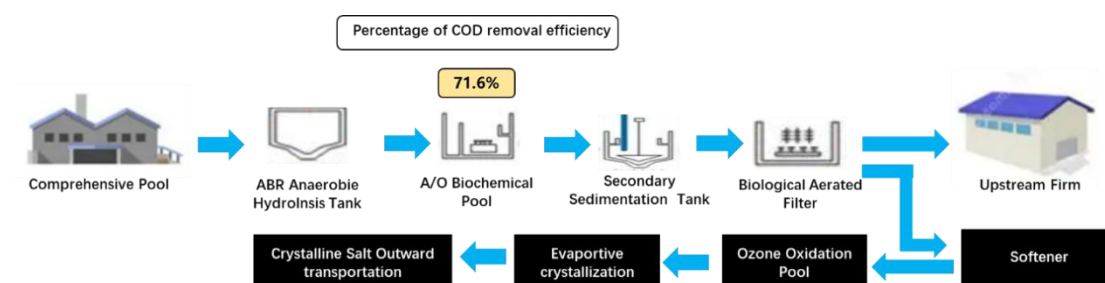

Fig.S1 Printing and Dyeing Factory Process Drawing

## 3. Experimental Operating Conditions

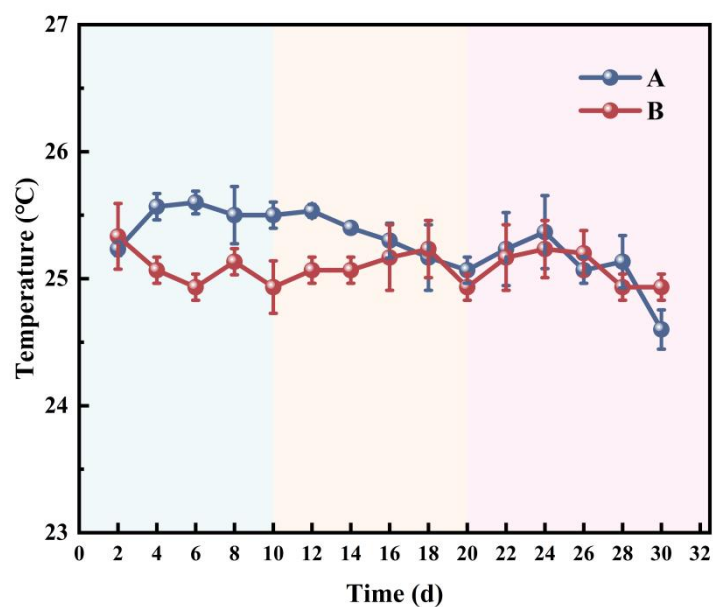

Fig.S2 Variation of temperature at different aeration in two systems

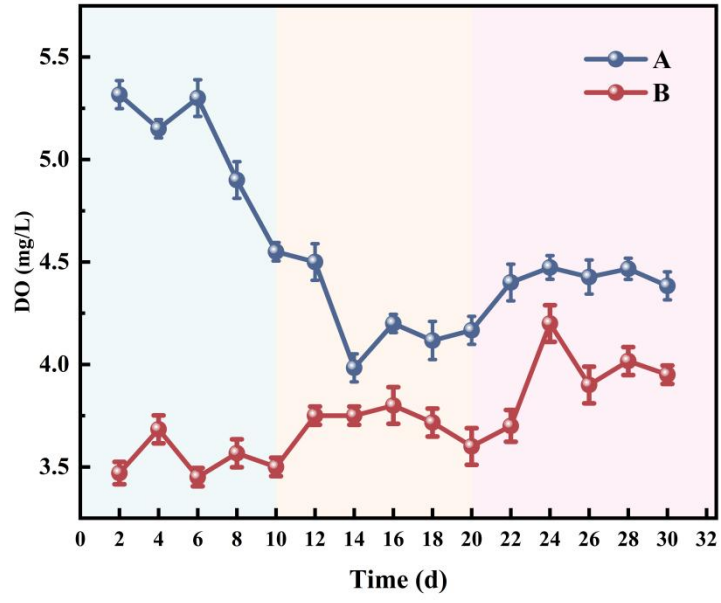

Fig.S3 Variation of DO at different aeration in two systems
